# Supplementary material for: Activin promotes skin carcinogenesis by attraction and reprogramming of macrophages
Source: PubMed Central journal article supplement (PMC5210090; doi:10.15252/emmm.201606493), 2016-12-08
Supplement: EMMM-9-27-s002.pdf [file EMMM-9-27-s002.pdf]

## Expanded View Figures

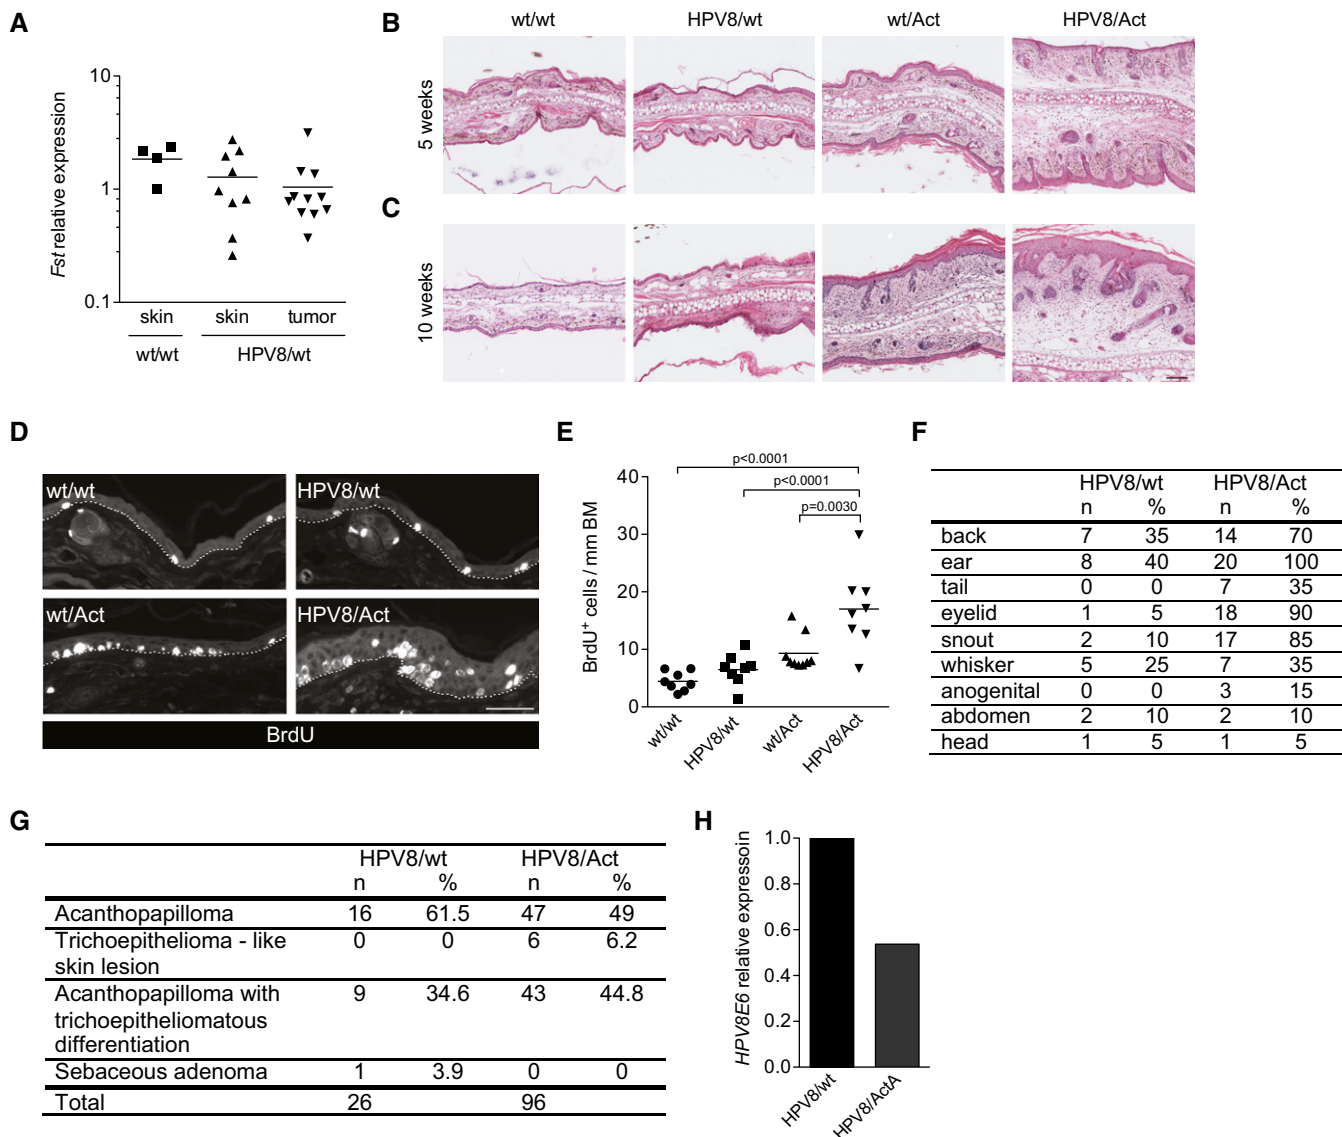

**Figure EV1. Characterization of skin tumors in HPV8/wt and HPV8/Act mice.**

- A** RNA samples from normal back skin of wt mice ( $N = 4$ ,  $n = 4$ ), non-affected back skin from HPV8/wt mice ( $N = 7$ ,  $n = 9$ ), and papillomas from HPV8/wt transgenic mice ( $N = 8$ ,  $n = 11$ ) were analyzed for the expression of *Fst* relative to *Gapdh* by qRT-PCR. Expression level in one of the wild-type back skin samples was set arbitrarily to 1.  $N$ , number of mice;  $n$ , number of biopsies.
- B, C** Representative pictures of H&E-stained ear skin sections of 5 (B)- or 10 (C)-week-old mice. Scale bar: 100  $\mu$ m.
- D** Representative pictures of BrdU-stained ear sections of 5-week-old mice. Dotted lines indicate the epidermal-dermal border. Scale bar: 50  $\mu$ m.
- E** Quantification of BrdU-positive cells per mm of basement membrane (BM).  $N = 8$  wt/wt, HPV8/wt, or HPV8/Act mice;  $N = 9$  wt/Act mice. Statistical significance was determined using one-way ANOVA and Bonferroni's multiple comparisons test.
- F** Body sites where tumor development in HPV8/wt and HPV8/Act mice was observed;  $n$ , number of mice with tumors at the indicated body site; %, percentage of mice with at least one tumor at the respective body site,  $N = 20$  mice per genotype.
- G** Histopathological analysis of tumors collected from HPV8/wt and HPV8/Act mice by a blinded histopathologist.  $n$ , number of tumors; %, percentage of tumors with the respective diagnosis among all tumors.
- H** RNA samples from MACS-sorted keratinocytes (CD45<sup>-</sup> epidermal fraction) were analyzed for the expression of the *HPV8E6* transgene relative to *Rps29* by qRT-PCR. Expression level in keratinocytes from HPV8/wt mice was set arbitrarily to 1. The experiment was performed with cells isolated and pooled from the ears of six mice per genotype.

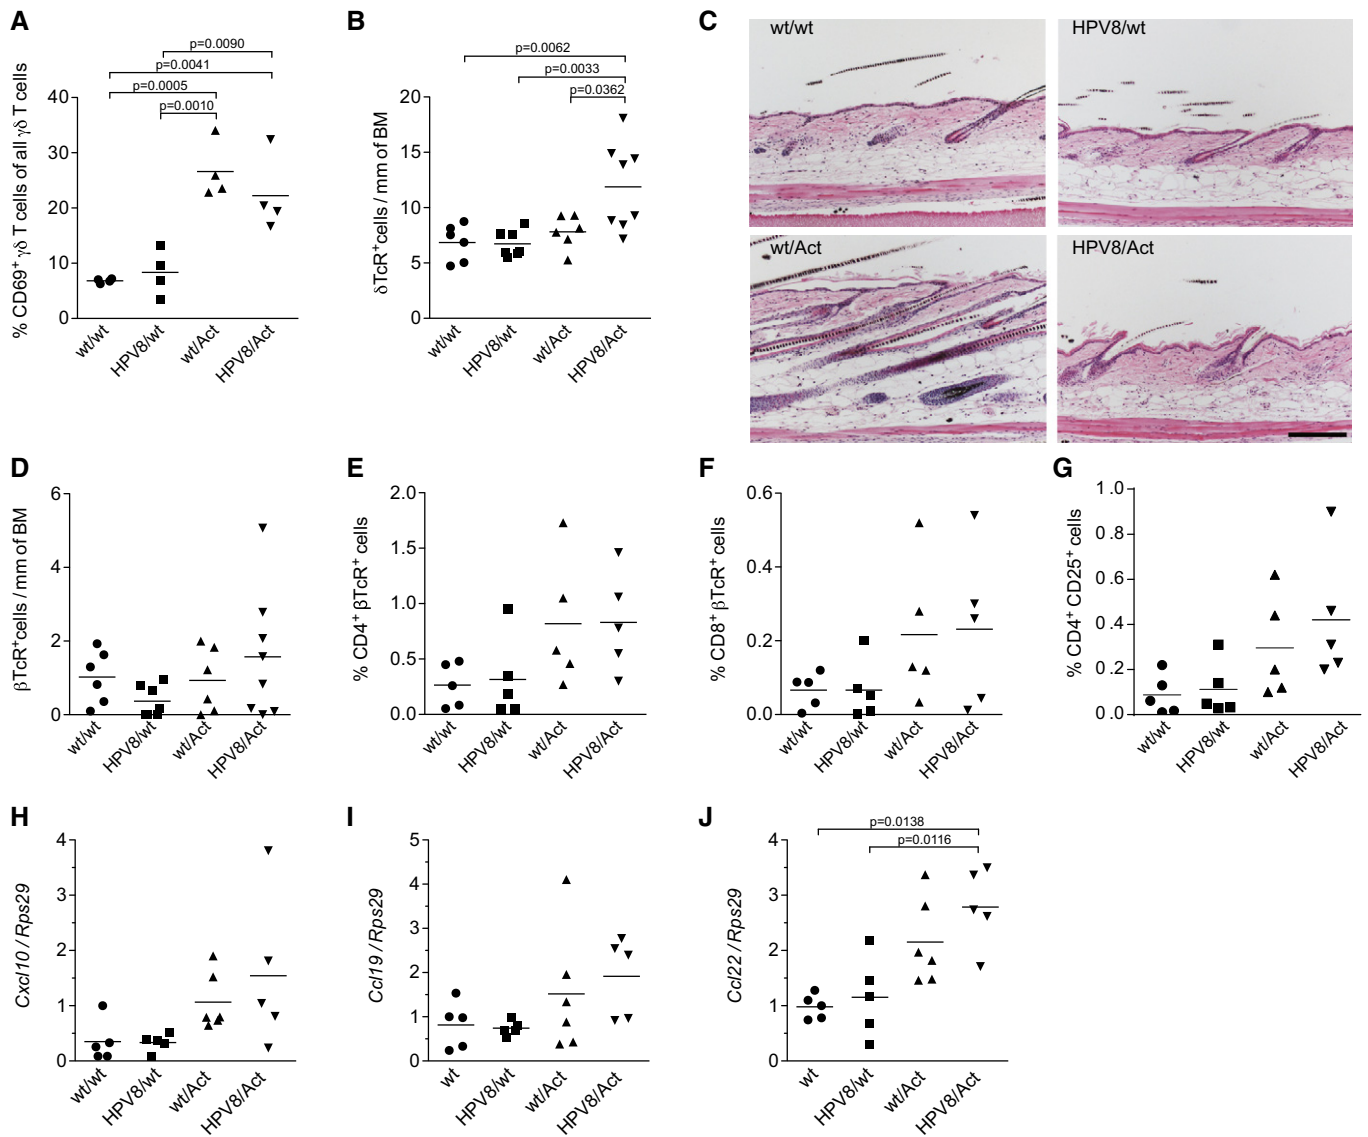

**Figure EV2. Activin affects T cells and expression of T-cell chemokines in the skin.**

**A** Percentage of activated CD69<sup>+</sup>γδ T cells in the ear skin epidermis of 14-week-old mice, analyzed by flow cytometry. wt/wt mice (N = 4); HPV8/wt mice (N = 4); wt/Act mice (N = 4); HPV8/Act mice (N = 4). N, number of mice.

**B** Quantification of δTcR<sup>+</sup> cells in cryosections of back skin from 10-week-old wt/wt mice (N = 6), HPV8/wt mice (N = 7), wt/Act mice (N = 6), and HPV8/Act mice (N = 8).

**C** Representative pictures of H&E-stained sections of back skin at 10 weeks of age. Scale bar: 100 μm.

**D** Quantification of βTcR<sup>+</sup> cells in cryosections of back skin from 10-week-old wt/wt mice (N = 6), HPV8/wt mice (N = 7), wt/Act mice (N = 6), and HPV8/Act mice (N = 8).

**E–G** Quantification of CD4<sup>+</sup> (E), CD8<sup>+</sup> (F), and CD4<sup>+</sup>CD25<sup>+</sup> (G) T cells in the ear skin dermis of 14-week-old mice by flow cytometry. Results from five experiments with ears pooled from at least three mice per genotype are shown.

**H–J** RNA samples from total ear skin were analyzed for the expression of chemokines relative to *Rps29* by qRT-PCR. Expression in one of the wild-type ear skin samples was set to 1. Log<sub>2</sub>-transformed data were used for statistical analysis. wt/wt mice (N = 5); HPV8/wt mice (N = 5); wt/Act mice (N = 6); HPV8/Act mice (N = 5).

Data information: Statistical significance was determined using one-way ANOVA and Bonferroni's multiple comparisons test of original (A–G) or log-transformed (H–J) data.

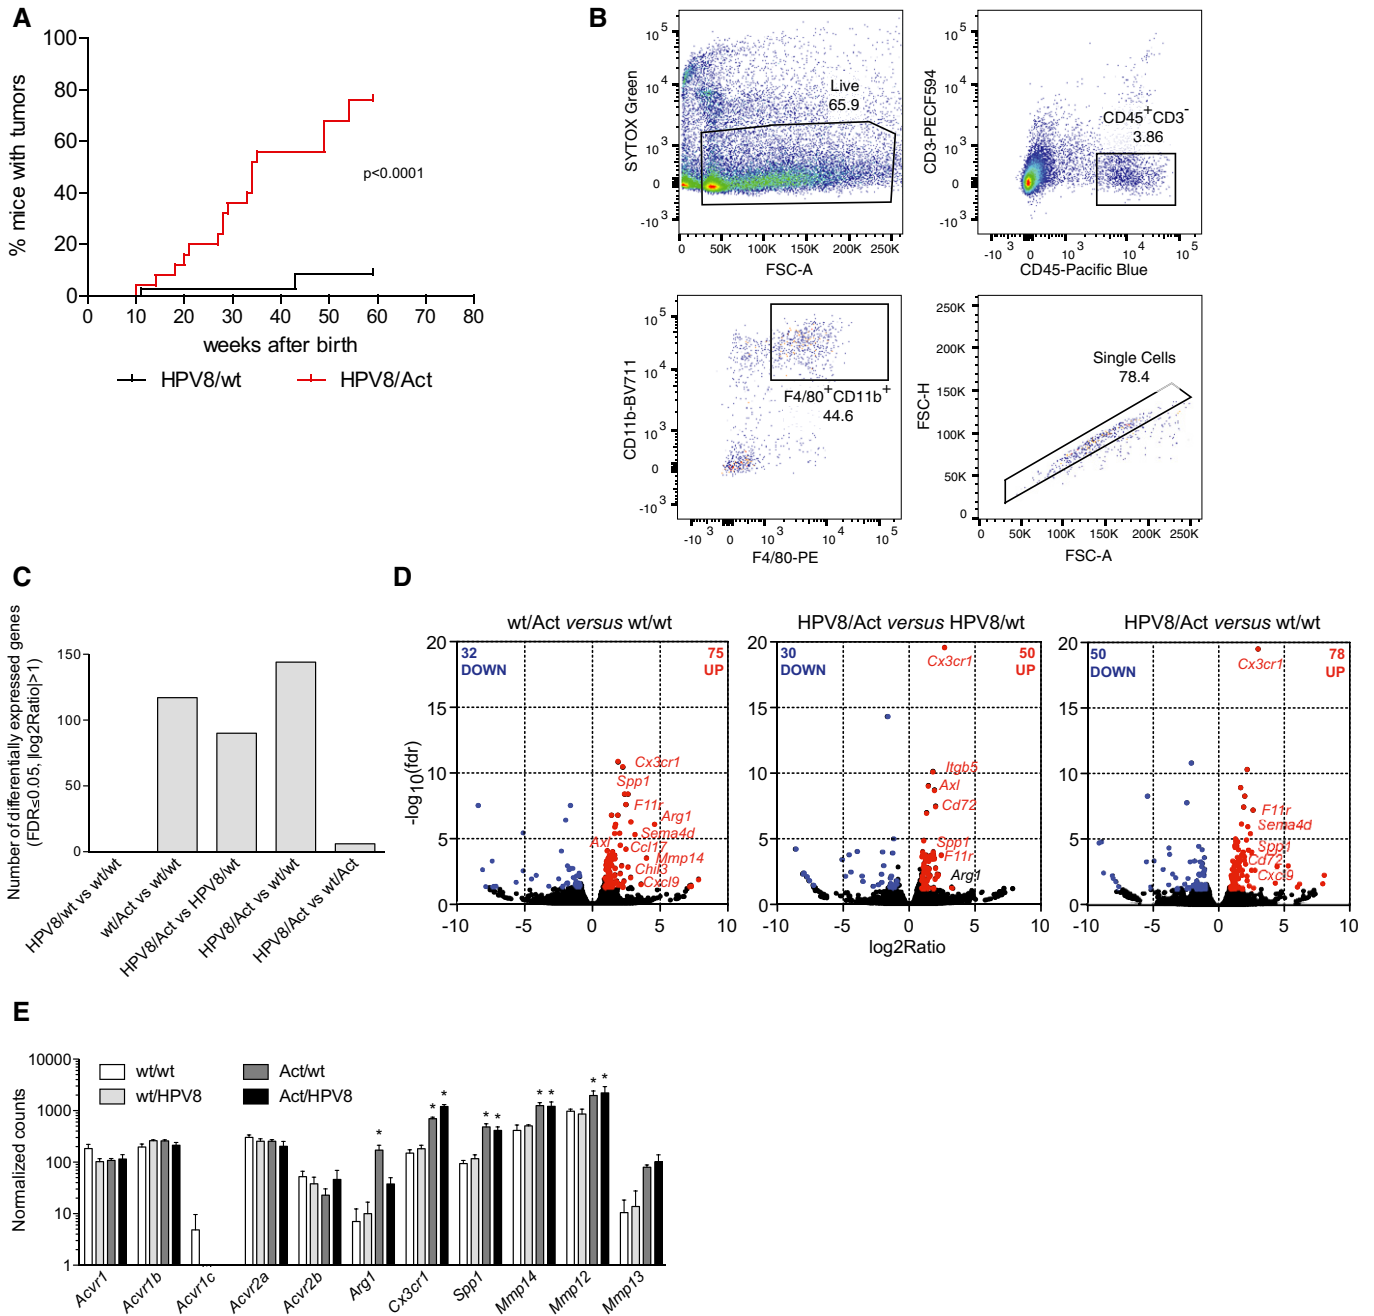

**Figure EV3. Activin induces a pro-tumorigenic gene expression pattern in macrophages.**

- A** Kinetics of tumor incidence in HPV8/wt and HPV8/Act mice after transfer of the mice into a new animal facility;  $N = 32$  for HPV/wt,  $N = 23$  for HPV8/Act mice. Statistical significance was determined using the log-rank (Mantel–Cox) test.  $N$ , number of mice.
- B** Gating strategy to enrich macrophages from ear skin of 13- to 15-week-old female mice by FACS. Representative pseudo-color plots of one of the wt/wt samples are shown. Single F4/80<sup>+</sup>CD11b<sup>+</sup> cells were sorted after gating on single viable (SYTOX Green-negative) CD45<sup>+</sup>CD3<sup>-</sup> cells.
- C** Number of differentially expressed genes (FDR < 0.05, |log<sub>2</sub>FC| > 1) identified by RNA sequencing of F4/80<sup>+</sup>CD11b<sup>+</sup> cells isolated from ear skin of 13- to 15-week-old female mice by FACS. Each replicate represents cells sorted from a pool of 3–6 mice per genotype in an independent experiment.
- D** Differential expression of genes was analyzed using the edgeR software package. Volcano plots show comparisons between wt/Act and wt/wt mice, HPV8/Act and HPV8/wt mice, or HPV8/Act and wt/wt mice. Significantly upregulated genes (FDR ≤ 0.05, log<sub>2</sub>ratio > 1) are highlighted in red, downregulated genes (FDR ≤ 0.05, log<sub>2</sub>ratio < -1) in blue.
- E** Normalized counts of transcripts for activin receptors and several tumor-promoting genes identified by RNA sequencing.  $N = 3$ . \*FDR < 0.05 for comparison with wt/wt mice. Statistical significance was determined using exact test adapted for over-dispersed data. Exact  $P$ -values for different comparisons can be found in Dataset EV2.  $N$  = number of pools of 3–6 mice, mean ± SEM.
