# Supplementary material for: Activin promotes skin carcinogenesis by attraction and reprogramming of macrophages
Source: PubMed Central journal article supplement (PMC5210090; doi:10.15252/emmm.201606493), 2016-12-08

Original Blots

FIGURE 5C

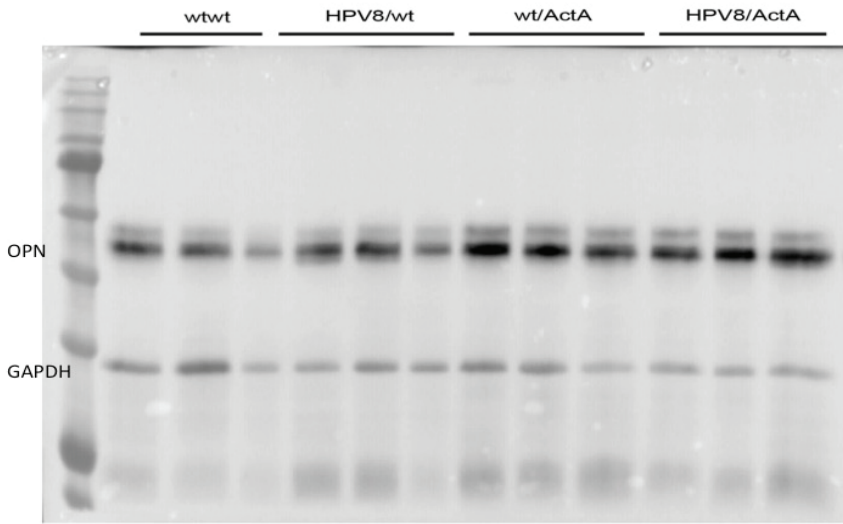

FIGURE 5H

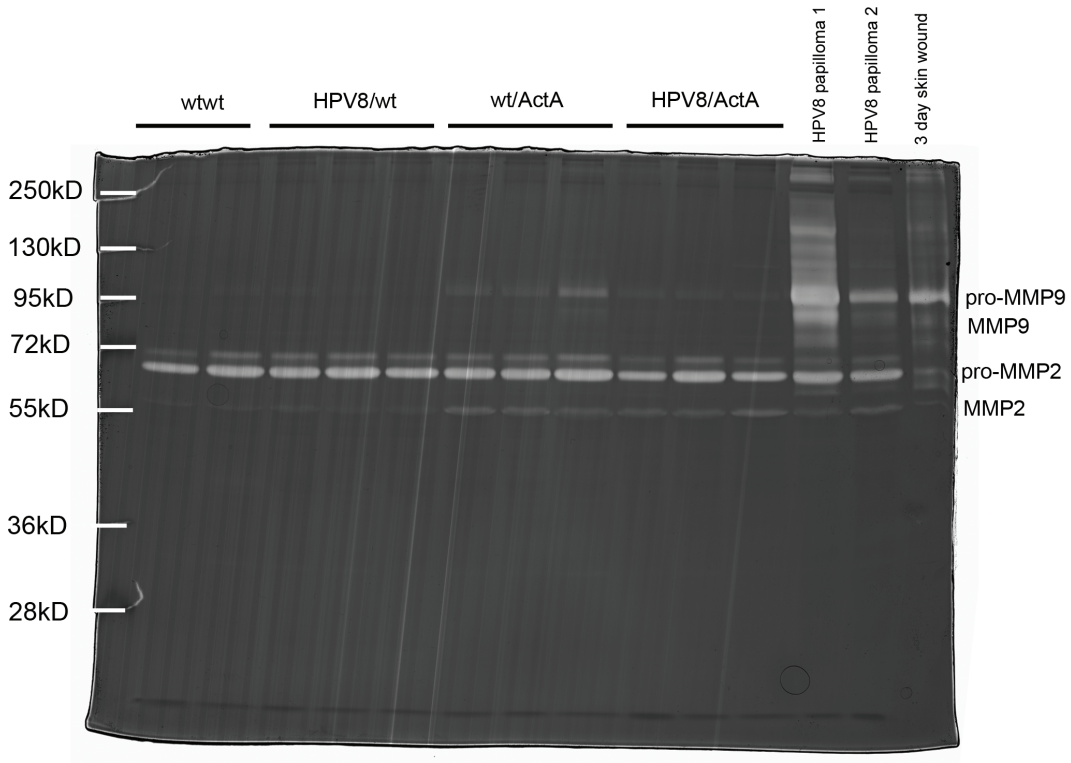

Supplement: EMMM-9-27-s007.pdf [file EMMM-9-27-s007.pdf]
